# Supplementary material for: A randomized placebo-controlled trial of nicotinamide riboside and pterostilbene supplementation in experimental muscle injury in elderly individuals
Source: JCI journal article supplement (doi:10.1172/jci.insight.158314), 2022-08-23
Supplement: sd2 [file 2]

You are being redirected.
